# Supplementary material for: The Drosophila F-box protein Fbxl7 binds to the protocadherin Fat and regulates Dachs localization and Hippo signaling
Source: eLife journal article supplement (doi:10.7554/elife.03383), 2014-08-08
Supplement: supp [file elife-03383-supp-v1.zip]

A

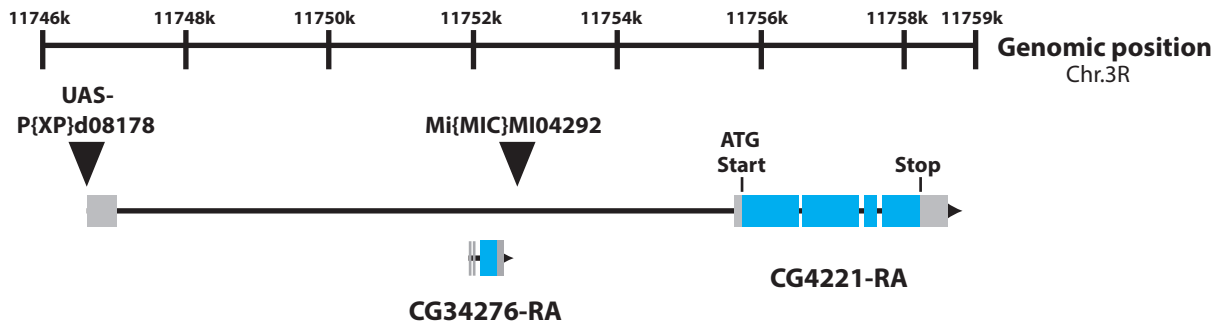

B

|                  |       |                                                                                                                    |       |
|------------------|-------|--------------------------------------------------------------------------------------------------------------------|-------|
| Drosophila Fbxl7 | 1     | MSHKT SNRR SSDLECP LAS LGRNSNAVRDHYHHHPPLSS SP LDPQAY KMMSRK SPNPGLEVAEALASRSTPP SDQAGA SSTA AAAAVLHMVQKKAATFE     | 100   |
| Human FBXL7      | 1     | -----                                                                                                              | ----- |
| Mouse FBXL7      | 1     | -----                                                                                                              | ----- |
| Zebrafish Fbxl7  | 1     | -----                                                                                                              | ----- |
| Drosophila Fbxl7 | 101   | L RGRH SRPT EQQT SYGAHSTA SVGRHAKK SP ELPA PARS RVAP VPQPRNF LT LEHVLQFGT QRP SWMHGNSADTEDS SDNNAGGGGAGSGSGGAGGRRA | 200   |
| Human FBXL7      | ----- | -----                                                                                                              | ----- |
| Mouse FBXL7      | ----- | -----                                                                                                              | ----- |
| Zebrafish Fbxl7  | ----- | -----                                                                                                              | ----- |
| Drosophila Fbxl7 | 201   | X GGGRC SVPT VLSNGSGGNAQYLLDDKKMESLYLGNALRT LP LGAEASQFQNERYY LEDYSSSGSNERLPERLHPRTSSP SETSGSDRYLLNRSSNSNH         | 300   |
| Human FBXL7      | 1     | -----                                                                                                              | ----- |
| Mouse FBXL7      | 1     | -----                                                                                                              | ----- |
| Zebrafish Fbxl7  | 1     | -----                                                                                                              | ----- |
| Drosophila Fbxl7 | 301   | LHSKGQSLSDGLCNLGRFSPSLDQGYATLVS PPTGHHS SGGAGNVNTSTASGAGIMASSTPTTTT PRRG--ASSNGLGGGAA-SAIGPP PWNRR-----            | 391   |
| Human FBXL7      | 30    | TPTKAQKN-----VATSESDLSMRTLSTPSPALIC-----PPNLPGFQNGRGSSTSSSSITGETVAMVHSPPTRTLTHPLIR                                 | 102   |
| Mouse FBXL7      | 30    | TPTKAQRN-----VATSESDLSMRTLSTPSPALIC-----PPNLPGFQNGRGSSTSSSSITGETVAMVHSPPTRTLTHPLIR                                 | 102   |
| Zebrafish Fbxl7  | 30    | TSTKAPKN-----AATSESDLSMRTLSTPSPALIL-----PPRSSAV-LNGSSTSSSTFGTETIAMVHMRPTSLTHPQR                                    | 100   |
|                  |       |                                                                                                                    |       |
| F-box            |       |                                                                                                                    |       |
| Drosophila Fbxl7 | 392   | --KGFRCGPLFDRLPDEAVRIFSWLDSCELCNVARVCRRFEHLAWRPILWKVSLRGEHLNGDKTKMIFRLCGQSCNGACP EVERVMLADGCRISD                   | 489   |
| Human FBXL7      | 103   | LASRPQKEQASIDRLPDHSMVQIFSF LPTNQLCRCARVCRRWYNLAWDPRLWRTIRLTGET INVDRALKVLRRLCQDT-PNVCLMLETVT VSGCRR LTD            | 201   |
| Mouse FBXL7      | 103   | LASRPQKEQASIDRLPDHSMVQIFSF LPTNQLCRCARVCRRWYNLAWDPRLWRTIRLTGET INVDRALKVLRRLCQDT-PNVCLMLETVT VSGCRR LTD            | 201   |
| Zebrafish Fbxl7  | 101   | LQPRDQGGAPVDILPDHAFLOIFTHLPTNQLCRCARVCRRWYNLAWDPRLWRTIRLTGDV LHVDRARVLRRLCQDT-PNVCLTVETVMVSGCRR LTD                | 199   |
|                  |       |                                                                                                                    |       |
| LRR1             |       |                                                                                                                    |       |
| Drosophila Fbxl7 | 490   | KGLQLLTRRCPELTHLQQTVDITNQA LVEALTKCSNLQHLVDVTCGSQVSSI SPNPHME-----PPRRL LQYLDLTDCAIDMDMGLKIVVKNCPLV                | 583   |
| Human FBXL7      | 202   | RGLYTIAQCCEP LRRLEVS GGCYNISNEAVFDVSLCPNLEHLDVSGCSKVTCISLTREASIKLSPLHGKQISIRYLDMTDCFVLEDEGLHTIAAHCTQLT             | 301   |
| Mouse FBXL7      | 202   | RGLYTIAQCCEP LRRLEVS GGCYNISNEAVFDVSLCPNLEHLDVSGCSKVTCISLTREASIKLSPLHGKQISIRYLDMTDCFVLEDEGLHTIAAHCTQLT             | 301   |
| Zebrafish Fbxl7  | 200   | RGLYTVAQSCPELRRLEVAGCYNISNEAVFEVSRCPNLEHLDVSGCSKVTCISLT RDVS VKLSPLHGKQISIRYLDMTDCFALEDEGLHTIAAHCTQLT              | 299   |
|                  |       |                                                                                                                    |       |
| LRR2             |       |                                                                                                                    |       |
| Drosophila Fbxl7 | 584   | YLYLRRCIQVTDAGLKFVPSFVSLKELSVSDCLNITDFGLYELAKLGAA LRYLSVAKCERVSDAGLKVIA RRCYKLRYL NARGCEAVSDDSITVLARS              | 683   |
| Human FBXL7      | 302   | HLYLRRCVRLTDEGLRYLVIIYCASIKELSVSDCLNITDFGLYELAKLGAA LRYLSVAKCERVSDAGLKVIA RRCYKLRYL NARGCEGITDHGVEYLAKNC           | 401   |
| Mouse FBXL7      | 302   | HLYLRRCVRLTDEGLRYLVIIYCASIKELSVSDCLNITDFGLYELAKLGAA LRYLSVAKCERVSDAGLKVIA RRCYKLRYL NARGCEGITDHGVEYLAKNC           | 401   |
| Zebrafish Fbxl7  | 300   | HLYLRRCVRLTDEGLRFLVIYCPGVRELSVSDCLNITDFGLYELAKLGAA LRYLSVAKCERVSDAGLKVIA RRCYKLRYL NARGCEGLTDHGIEHLAKSC            | 399   |
|                  |       |                                                                                                                    |       |
| LRR3             |       |                                                                                                                    |       |
| Drosophila Fbxl7 | 684   | PRLRALDIGKCD-VSDAGLRLAESCPNLKLSLRSCDMITDRGVQCIAYYCRGLQQLNIQDCPVSI EGYRAVKKYKRCIIEHTNP GFC                          | 772   |
| Human FBXL7      | 402   | TKLKSLDIGKCPVSDTGLSCLALNCFNLKRLSLKSCESITGGLQIVAA NCFDLQMLNVQDCQVSV EALRFVKRHKCRKVIIEHTNPAFF                        | 491   |
| Mouse FBXL7      | 402   | TKLKSLDIGKCPVSDTGLSCLALNCFNLKRLSLKSCESITGGLQIVAA NCFDLQMLNVQDCQVSV EALRFVKRHKCRKVIIEHTNPAFF                        | 491   |
| Zebrafish Fbxl7  | 400   | LKLKSLDIGKCPVSDAGLEQLALNSFNLKRLSLKSCESITGRGLQVVA NCFDLQLNVQDCQVSL EALRFVKRHKCRKVIIEHTNPAFF                         | 489   |

C

| Residue | 1   | 2 | 3 | 4 | 5 | 6 | 7 | 8 | 9 | 10 | 11 | 12 | 13 | 14 | 15 | 16 | 17 | 18 | 19 | 20 | 21 | 22 | 23 | 24 | 25 | 26 |   |   |   |
|---------|-----|---|---|---|---|---|---|---|---|----|----|----|----|----|----|----|----|----|----|----|----|----|----|----|----|----|---|---|---|
| LRR1    | 476 | V | E | R | V | M | L | A | D | G  | C  | R  | I  | S  | D  | K  | G  | L  | Q  | L  | T  | R  | R  | C  | P  | E  |   |   |   |
| LRR2    | 502 | L | T | H | L | Q | L | Q | T | C  | V  | D  | I  | T  | N  | Q  | A  | L  | V  | E  | A  | L  | T  | K  | C  | S  | N |   |   |
| LRR3    | 528 | L | Q | H | L | D | V | T | G | C  | S  | Q  | V  | S  | S  | I  | S  | P  | N  | H  | M  | E  | P  | P  | R  | L  | L |   |   |
| LRR4    | 556 | L | Q | Y | L | D | L | T | D | C  | M  | A  | I  | D  | D  | M  | G  | L  | K  | I  | V  | V  | K  | N  | C  | P  | Q |   |   |
| LRR5    | 582 | L | V | Y | L | Y | L | R | R | C  | I  | Q  | V  | T  | D  | A  | G  | L  | K  | F  | V  | P  | S  | F  | V  | S  |   |   |   |
| LRR6    | 608 | L | K | E | L | S | V | S | D | C  | L  | N  | I  | T  | D  | F  | G  | L  | Y  | E  | L  | A  | K  | L  | G  | A  | A |   |   |
| LRR7    | 634 | L | R | Y | L | S | V | A | K | C  | E  | R  | V  | S  | D  | A  | G  | L  | K  | V  | I  | A  | R  | R  | C  | Y  | K |   |   |
| LRR8    | 660 | L | R | Y | L | N | A | R | G | C  | E  | A  | V  | S  | D  | S  | I  | T  | V  | L  | A  | R  | S  | C  | P  | R  |   |   |   |
| LRR9    | 686 | L | R | A | L | D | I | G | K | C  | D  | V  | -  | S  | D  | A  | G  | L  | R  | A  | L  | A  | E  | S  | C  | P  | N |   |   |
| LRR10   | 711 | L | K | K | L | S | L | R | S | C  | D  | M  | I  | T  | D  | R  | G  | V  | Q  | C  | I  | A  | Y  | C  | R  | G  |   |   |   |
| LRR11   | 737 | L | Q | Q | L | N | I | Q | S | C  | P  | V  | -  | S  | I  | E  | G  | R  | A  | V  | K  | K  | Y  | C  | K  | R  |   |   |   |
| LRR1    | 188 | L | E | T | V | T | V | S | G | C  | R  | R  | L  | T  | D  | R  | G  | L  | Y  | T  | I  | A  | Q  | C  | P  | E  |   |   |   |
| LRR2    | 214 | L | R | R | L | E | V | S | G | C  | Y  | N  | I  | S  | N  | E  | A  | V  | F  | D  | V  | V  | S  | L  | C  | P  | N |   |   |
| LRR3    | 240 | L | E | H | L | D | V | S | G | C  | S  | K  | V  | T  | C  | I  | S  | L  | T  | R  | E  | A  | S  | I  | K  | L  | S |   |   |
| LRR4    | 274 | I | R | Y | L | D | M | T | D | C  | F  | V  | L  | E  | D  | E  | G  | L  | H  | T  | I  | A  | A  | H  | C  | T  | Q |   |   |
| LRR5    | 300 | L | T | H | L | Y | L | R | R | C  | V  | R  | L  | T  | D  | E  | G  | L  | R  | Y  | L  | V  | I  | Y  | C  | A  | S |   |   |
| LRR6    | 326 | I | K | E | L | S | V | S | D | C  | R  | F  | V  | S  | D  | F  | G  | L  | R  | E  | I  | A  | K  | L  | E  | S  | R |   |   |
| LRR7    | 352 | L | R | Y | L | S | I | A | H | C  | G  | R  | V  | T  | D  | V  | G  | I  | R  | Y  | V  | A  | K  | Y  | C  | S  | K |   |   |
| LRR8    | 378 | L | R | Y | L | N | A | R | G | C  | E  | G  | I  | T  | D  | H  | G  | V  | E  | Y  | L  | A  | K  | N  | C  | T  | K |   |   |
| LRR9    | 404 | L | K | S | L | D | I | G | K | C  | P  | L  | V  | S  | D  | T  | G  | L  | E  | C  | L  | A  | L  | N  | C  | F  | N |   |   |
| LRR10   | 430 | L | K | R | L | S | L | K | S | C  | E  | S  | I  | T  | G  | Q  | G  | L  | Q  | I  | V  | A  | A  | N  | C  | F  | D |   |   |
| LRR11   | 456 | L | Q | T | L | N | V | Q | D | C  | E  | V  | -  | S  | V  | E  | A  | L  | R  | F  | V  | K  | R  | H  | C  | K  | R |   |   |
| LRR1    | 417 | L | E | R | L | T | L | V | F | C  | K  | H  | I  | T  | S  | V  | P  | I  | S  | A  | V  | L  | R  | G  | C  | K  | F |   |   |
| LRR2    | 443 | L | Q | S | V | D | I | T | G | I  | R  | D  | V  | S  | D  | D  | V  | F  | D  | T  | L  | A  | T  | Y  | C  | P  | R |   |   |
| LRR3    | 469 | V | Q | G | F | Y | V | P | Q | A  | R  | N  | V  | T  | F  | D  | S  | L  | R  | N  | F  | I  | V  | H  | S  | P  | M |   |   |
| LRR4    | 495 | L | K | R | I | K | I | T | A | N  | N  | N  | M  | N  | D  | E  | L  | V  | E  | L  | L  | A  | N  | K  | C  | P  | L |   |   |
| LRR5    | 521 | L | V | E | V | D | I | T | L | S  | P  | N  | V  | T  | D  | S  | S  | L  | K  | L  | L  | T  | R  | L  | V  | Q  |   |   |   |
| LRR6    | 547 | L | R | E | F | R | I | T | H | N  | T  | N  | I  | T  | D  | N  | L  | F  | Q  | E  | L  | S  | K  | V  | D  | D  | M | P | S |
| LRR7    | 576 | L | R | L | I | D | L | S | G | C  | E  | N  | I  | T  | D  | K  | T  | I  | E  | S  | I  | V  | N  | L  | A  | P  | K |   |   |
| LRR8    | 602 | L | R | N | V | F | L | G | K | C  | S  | R  | I  | T  | D  | A  | S  | L  | F  | Q  | L  | S  | K  | L  | G  | K  | N |   |   |
| LRR9    | 628 | L | Q | T | V | H | F | G | H | C  | F  | N  | I  | T  | D  | N  | G  | V  | R  | A  | L  | F  | H  | S  | C  | T  | R |   |   |
| LRR10   | 654 | I | Q | Y | V | D | F | A | C | C  | T  | N  | L  | T  | N  | R  | T  | L  | Y  | E  | L  | A  | D  | L  | P  | K  | - |   |   |
| LRR11   | 679 | L | K | R | I | G | L | V | K | C  | T  | Q  | M  | T  | D  | E  | G  | L  | N  | M  | V  | S  | L  | R  | G  | R  | N | D | T |
| LRR12   | 708 | L | E | R | V | H | L | S | Y | C  | S  | N  | L  | T  | I  | Y  | P  | I  | E  | L  | M  | S  | C  | P  | R  | -  | - |   |   |

Cys-containing LRR subfamily consensus

conserved

variable
