# Supplementary material for: The Drosophila F-box protein Fbxl7 binds to the protocadherin Fat and regulates Dachs localization and Hippo signaling
Source: eLife journal article supplement (doi:10.7554/elife.03383), 2014-08-08
Supplement: supp [file elife-03383-supp-v1.zip]

## Supplementary File 2 - Oligo Table

| Oligo name     | Sequence                                                                    |
|----------------|-----------------------------------------------------------------------------|
| Not1-Fbx17-F   | CGGCGGCGGCCGCTTCGCACAAGACTAGCAACCG                                          |
| Xba1-Fbx17-R   | GCCGTCTAGATCAACAGAATCCCGGATTTG                                              |
| C616Y-SDM-F    | GTGTGTCCGACTACCTGAACATCAC                                                   |
| C616Y-SDM-R    | GTGATGTTCAAGGTAGTCGGACACAC                                                  |
| Not1-Fbx17Δ1-F | CGGCGGCGGCCGCTTGGAACCGCAAAGGTCCC                                            |
| Not1-Fbx17Δ2-F | CGGCGGCGGCCGCTTCGCTGCGGGGCGAGCACT                                           |
| Xba1-Fbx17Δ3-R | GCGGTCTAGATTCAAGGCGGCGGTCCAATGGC                                            |
| Not1-GFP-F     | GGCGGAGGTGCGGCCGCTGTGAGCAAGGGCGAGGAG                                        |
| Xba1-GFP-R     | ACAAAGATCCTCTAGATCACTTGTACAGCTCGTCCA                                        |
| Not1-SkpA-F    | CGCGTCGCGGCCCGCCACCATGCCAGCATCAAGTTGC                                       |
| Xba1-SkpA-R    | GCCGTCTAGAGACTTCTCCTCGCACCACTCGT                                            |
| Kpn1-Cul1-F    | CTAGTGGTACCCACCATGAACCGCTCCGGCAAT                                           |
| Not1-Cul1-R    | GACGCGGCGGCCGCTGGCGAGATAACTATATGTGTCTTTG                                    |
| Not1-Cul1DN-R  | GACGCGGCGGCCGCTCACGACCATCACCTGGTTAAGA                                       |
| Not1-Fat1CD-F  | CGTCGCGGCCGCAAAATGGAGAGGCTACTGCTCC                                          |
| Xba1-Fat1CD-R  | GCGCGTCTAGATTACGTAGAATCGAGACCGAGGA                                          |
| Fat61SDM-F     | GCAGCCGCGCATTCTCATTTTGCACGACATTTCCGG                                        |
| Fat61SDM-R     | CCGGAAATGTCTGTGCAAAATGAGAATGCGCGGCTGC                                       |
| EcoRI-HA-Ub-F  | CGCGTCGAATTCCAAAATGTACCCATACGATGTTCCAGATTAC<br>GCTCAAATTTTCGTAAAGACCCTCACTG |
| Xba1-Ub-R      | GCCGTCTAGACTAGCCACCACGCAGACGCAG                                             |
| Not1-cindr-F   | CGCGTCGCGGCCCGCCACCATGGAAAACAACATCTGTGCA                                    |
| Xba1-cindr-R   | GCCGTCTAGAGAACTTGCGTCACGCACTG                                               |
| DRSC15513-F    | TAATACGACTCACTATAGGGCGACCTTTGAGTTGAGAGG                                     |
| DRSC15513-R    | TAATACGACTCACTATAGGGGCGAGTCGCTCGTTCCC                                       |
| DRSC38270-F    | TAATACGACTCACTATAGGGATCTGAACGCTCGAGGATGT                                    |
| DRSC38270-R    | TAATACGACTCACTATAGGGCCAAAAGTCCGTGTATGGCT                                    |
| GFPdsRNA-F     | TAATACGACTCACTATAGGGATGGTGAGCAAGGGCGAG                                      |
| GFPdsRNA-R     | TAATACGACTCACTATAGGGCTTGTACAGCTCGTCCATGC                                    |
