# Supplementary material for: The Drosophila F-box protein Fbxl7 binds to the protocadherin Fat and regulates Dachs localization and Hippo signaling
Source: eLife journal article supplement (doi:10.7554/elife.03383), 2014-08-08
Supplement: supp [file elife-03383-supp-v1.zip]

**Supplementary File 1 - Localization of FLAG-Fbx17 and vesicle markers.** List of tagged proteins that localize to vesicles, are related to vesicle trafficking, and proteins interacting with Fat. Colocalization was assessed with FLAG-Fbx17 in the wing imaginal disc. BL indicates Bloomington Drosophila Stock Center.

| Gene   | Localization          | Overlap w/ Fbx17? | BL #  | Stock genotype               | Ref                  |
|--------|-----------------------|-------------------|-------|------------------------------|----------------------|
| Rab1   | Endoplasmic reticulum | no                | 24104 | P{UAST-YFP.Rab1}Mes2[01]     | (Zhang et al., 2007) |
| Rab2   |                       | no                | 23246 | P{UAST-YFP.Rab2}(3)neo38[02] | (Zhang et al., 2007) |
| Rab3   |                       | no                | 9763  | P{UASp-YFP.Rab3}4EHP[05b]    | (Zhang et al., 2007) |
| Rab4   | Early endosomes       | no                | 9767  | P{UASp-YFP.Rab4}Sap-r[32]    | (Zhang et al., 2007) |
| Rab5   | Early endosomes       | no                | 24616 | P{UASp-YFP.Rab5}02           | (Zhang et al., 2007) |
| Rab6   | Golgi                 | no                | 23251 | P{UAST-YFP.Rab6}CG10082[01]  | (Zhang et al., 2007) |
| Rab7   | Late endosomes        | no                | 23270 | P{UASp-YFP.Rab7}vig2[18]     | (Zhang et al., 2007) |
| Rab7   | Late endosomes        | no                | 23641 | P{UASp-YFP.Rab7}21           | (Zhang et al., 2007) |
| Rab8   |                       | no                | 23272 | P{UASp-YFP.Rab8}CG6175[09]   | (Zhang et al., 2007) |
| Rab9   |                       | no                | 9784  | P{UASp-YFP.Rab9}22           | (Zhang et al., 2007) |
| Rab9Db |                       | no                | 50774 | P{UASp-YFP.CG9807}28         | (Zhang et al., 2007) |
| Rab9E  |                       | no                | 9833  | P{UASp-YFP.CG32673}35        | (Zhang et al., 2007) |
| Rab9Fb |                       | no                | 23276 | P{UASp-YFP.Rab9Fb}how[Rab24] | (Zhang et al., 2007) |
| Rab10  |                       | no                | 9789  | P{UASp-YFP.Rab10}21          | (Zhang et al., 2007) |
| Rab11  | Recycling endosomes   | no                | 9790  | P{UASp-YFP.Rab11}sra[32]     | (Zhang et al., 2007) |
| Rab14  |                       | no                | 9794  | P{UASp-YFP.Rab14}12          | (Zhang et al., 2007) |
| Rab18  |                       | no                | 9796  | P{UAST-YFP.Rab18}CG9775[01]  | (Zhang et al., 2007) |
| Rab19  |                       | no                | 24150 | P{UAST-YFP.Rab19}Hr39[02]    | (Zhang et al., 2007) |
| Rab21  |                       | no                | 23242 | P{UAST-YFP.Rab21}pog[04]     | (Zhang et al., 2007) |
| Rab23  |                       | no                | 9802  | P{UASp-YFP.Rab23}01          | (Zhang et al., 2007) |
| Rab26  |                       | no                | 23244 | P{UAST-YFP.Rab26}Lmpt[01]    | (Zhang et al., 2007) |
| Rab27  |                       | no                | 24769 | P{UASp-YFP.Rab27}14          | (Zhang et al., 2007) |
| Rab30  |                       | no                | 9812  | P{UASp-YFP.Rab30}Cdk4[10]    | (Zhang et al., 2007) |
| Rab32  |                       | no                | 9815  | P{UASp-YFP.ltd}RhoGDI[11]    | (Zhang et al., 2007) |
| Rab35  |                       | no                | 9821  | P{UASp-YFP.Rab35}15          | (Zhang et al., 2007) |
| Rab39  |                       | no                | 9825  | P{UASp-YFP.Rab39}13          | (Zhang et al., 2007) |
| Rab40  |                       | no                | 9830  | P{UAST-YFP.Rab40}Ptpmeg[03]  | (Zhang et al., 2007) |
| RabX1  |                       | no                | 23274 | P{UASp-YFP.RabX1}10          | (Zhang et al., 2007) |
| RabX2  |                       | no                | 23275 | P{UASp-YFP.RabX2}CG4936[08]  | (Zhang et al., 2007) |
| RabX4  |                       | no                | 9851  | P{UASp-YFP.RabX4}how[19]     | (Zhang et al., 2007) |
| RabX5  |                       | no                | 9854  | P{UASp-YFP.RabX5}eRF1[22b]   | (Zhang et al., 2007) |
| RabX6  |                       | no                | 23278 | P{UASp-YFP.RabX6}03          | (Zhang et al., 2007) |
| Galt   | Golgi                 | no                | 30902 | UAS-Galt-GFP                 |                      |

|          |                                        |      |       |                                             |                                  |
|----------|----------------------------------------|------|-------|---------------------------------------------|----------------------------------|
| KDEL     | Endoplasmic reticulum                  | no   | 9898  | P{UAS-GFP.KDEL}11.1                         |                                  |
| FYVE     | PI(3)P-bearing endosomes               | no   | 42712 | P{UAS-GFP-myc-2xFYVE}2                      |                                  |
| hLC3     | Autophagosomes                         | no   | 8730  | P{UASp-eGFP-huLC3}1                         |                                  |
| Atg8a    | Autophagosomes                         | no   | 52005 | P{UAS-Atg8a.GFP}2                           |                                  |
| Lamp1    | Lysosomes                              | no   |       | tub-LAMP1-GFP                               | (Akbar et al., 2009)             |
| Lamp1    | Lysosomes                              | no   |       | UAS-LAMP1-GFP                               | (Pulipparacharuvil et al., 2005) |
| nSyb     | Synaptic vesicles                      | no   | 6922  | P{UAS-nSyb.eGFP}3                           |                                  |
| Grasp65  | Golgi                                  | no   | 8508  | P{UAS-Grasp65-GFP}3                         |                                  |
| SKL      | peroxisomes                            | no   | 28882 | P{UAS-GFP.SKL}3                             |                                  |
| gammaCOP | Golgi                                  | no   | 29711 | P{UASp-gammaCOP.EGFP}3                      |                                  |
| mCD8     | membrane and secretory vesicles        | no   | 5130  | P{w[+mC]=UAS-mCD8::GFP.L}LL6                |                                  |
| Chc      | Clathrin coated vesicles               | no   |       | UAS-EGFP-Chc                                | (Burgess et al., 2011)           |
| Clc      | Clathrin coated vesicles               | no   | 7101  | P{w[+mC]=UAS-EGFP-Clc}3                     |                                  |
| Sqh      | Mysosin II                             | no   | 42234 | P{GFP-sqh.RLC}40                            |                                  |
| Cnn      | Centrosomes                            | no   | 7255  | P{UASp-GFP-Cnn1}26-1                        |                                  |
| Snx3     | Retromer                               | rare |       | UAS-Snx3-GFP                                | (Zhang et al., 2011)             |
| Vps35    | Retromer                               | some |       | UAS-Vps35-Myc                               | (Belenkaya et al., 2008)         |
| Vps29    | Retromer                               | rare |       | tub-vps29GFP                                | (Burgess et al., 2012)           |
| Wls      | Membrane/retromer                      | no   |       | UAS-Wls-V5                                  | (Belenkaya et al., 2008)         |
| Ena      | Adherens junctions                     | no   | 28798 | w[*]; P{w[+mC]=Ubi-GFP.ena}3                |                                  |
| Cindr    | Intercellular bridges, apical membrane | yes  | 50802 | y[1] w[*]; P{w[+mC]=PTT-GA}cindr[CA06686]   |                                  |
| Scraps   | Anillin                                | no   | 51348 | P{w[+mC]=UASp-GFP-scrap}3                   |                                  |
| Septin2  | Septin2                                | no   | 26257 | P{w[+mC]=Sep2-GFP.SG}3                      |                                  |
| Pav      | Ring canals                            | no   |       | ubi-pav-GFP                                 | (McLean and Cooley, 2013)        |
| Pod1     | Actin/Microtubules                     | no   | 8800  | w[*]; P{w[+mC]=UAS-pod1.GFPmyc}3/TM3, Sb[1] |                                  |
| Klp61F   | Mitotic spindles                       | no   | 35509 | w[*]; P{w[+mC]=Ubi-Klp61F.GFP}3             |                                  |

Akbar, M.A., Ray, S., and Kramer, H. (2009). The SM protein Car/Vps33A regulates SNARE-mediated trafficking to lysosomes and lysosome-related organelles.

*Molecular biology of the cell* 20, 1705-1714.

Belenkaya, T.Y., Wu, Y., Tang, X., Zhou, B., Cheng, L., Sharma, Y.V., Yan, D., Selva, E.M., and Lin, X. (2008). The retromer complex influences Wnt secretion by recycling wntless from endosomes to the trans-Golgi network. *Developmental cell* 14, 120-131.

Burgess, J., Del Bel, L.M., Ma, C.I., Barylko, B., Polevoy, G., Rollins, J., Albanesi, J.P., Kramer, H., and Brill, J.A. (2012). Type II phosphatidylinositol 4-kinase regulates

trafficking of secretory granule proteins in *Drosophila*. *Development* *139*, 3040-3050.

Burgess, J., Jauregui, M., Tan, J., Rollins, J., Lallet, S., Leventis, P.A., Boulianne, G.L., Chang, H.C., Le Borgne, R., Kramer, H., *et al.* (2011). AP-1 and clathrin are essential for secretory granule biogenesis in *Drosophila*. *Molecular biology of the cell* *22*, 2094-2105.

McLean, P.F., and Cooley, L. (2013). Protein equilibration through somatic ring canals in *Drosophila*. *Science* *340*, 1445-1447.

Pulipparacharuvil, S., Akbar, M.A., Ray, S., Sevrioukov, E.A., Haberman, A.S., Rohrer, J., and Kramer, H. (2005). *Drosophila* Vps16A is required for trafficking to lysosomes and biogenesis of pigment granules. *Journal of cell science* *118*, 3663-3673.

Zhang, J., Schulze, K.L., Hiesinger, P.R., Suyama, K., Wang, S., Fish, M., Acar, M., Hoskins, R.A., Bellen, H.J., and Scott, M.P. (2007). Thirty-one flavors of *Drosophila* rab proteins. *Genetics* *176*, 1307-1322.

Zhang, P., Wu, Y., Belenkaya, T.Y., and Lin, X. (2011). SNX3 controls Wingless/Wnt secretion through regulating retromer-dependent recycling of Wntless. *Cell research* *21*, 1677-1690.
