# Supplementary figures and images for: The Drosophila F-box protein Fbxl7 binds to the protocadherin Fat and regulates Dachs localization and Hippo signaling
Source: eLife journal article supplement (doi:10.7554/elife.03383), 2014-08-08

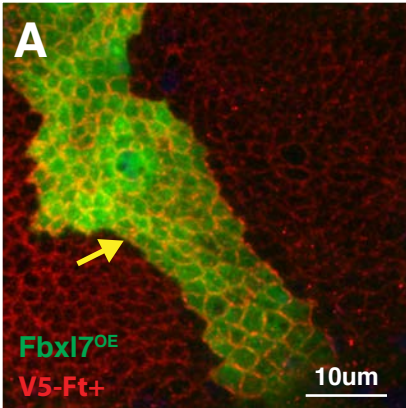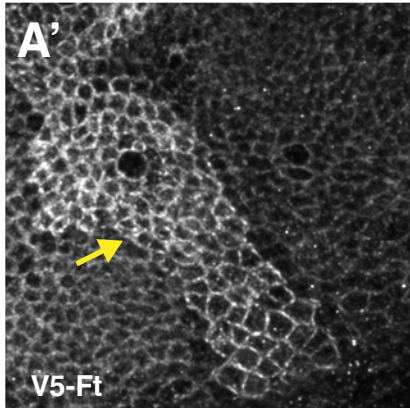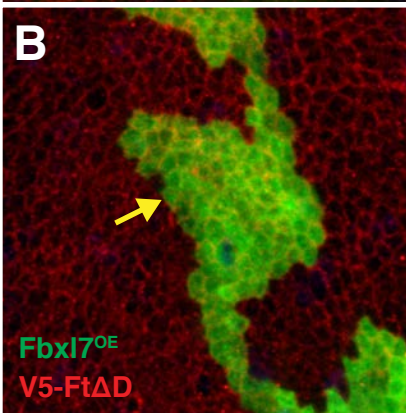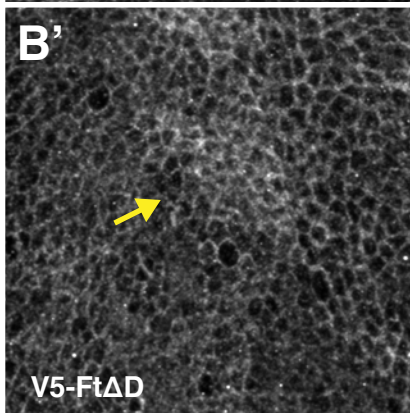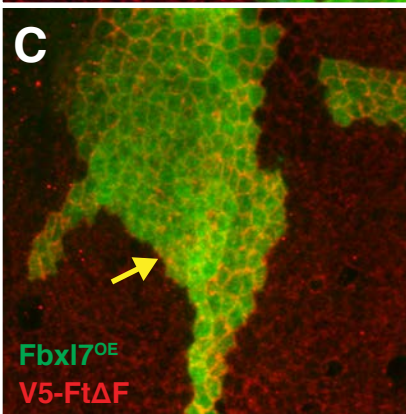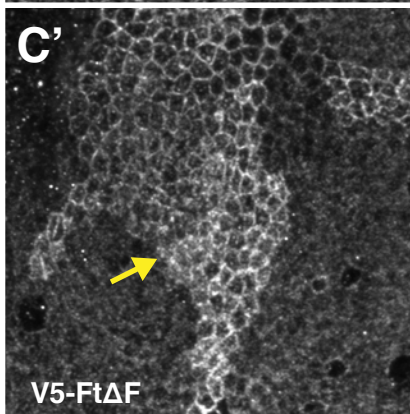

Supplement: supp [file elife-03383-supp-v1.zip]

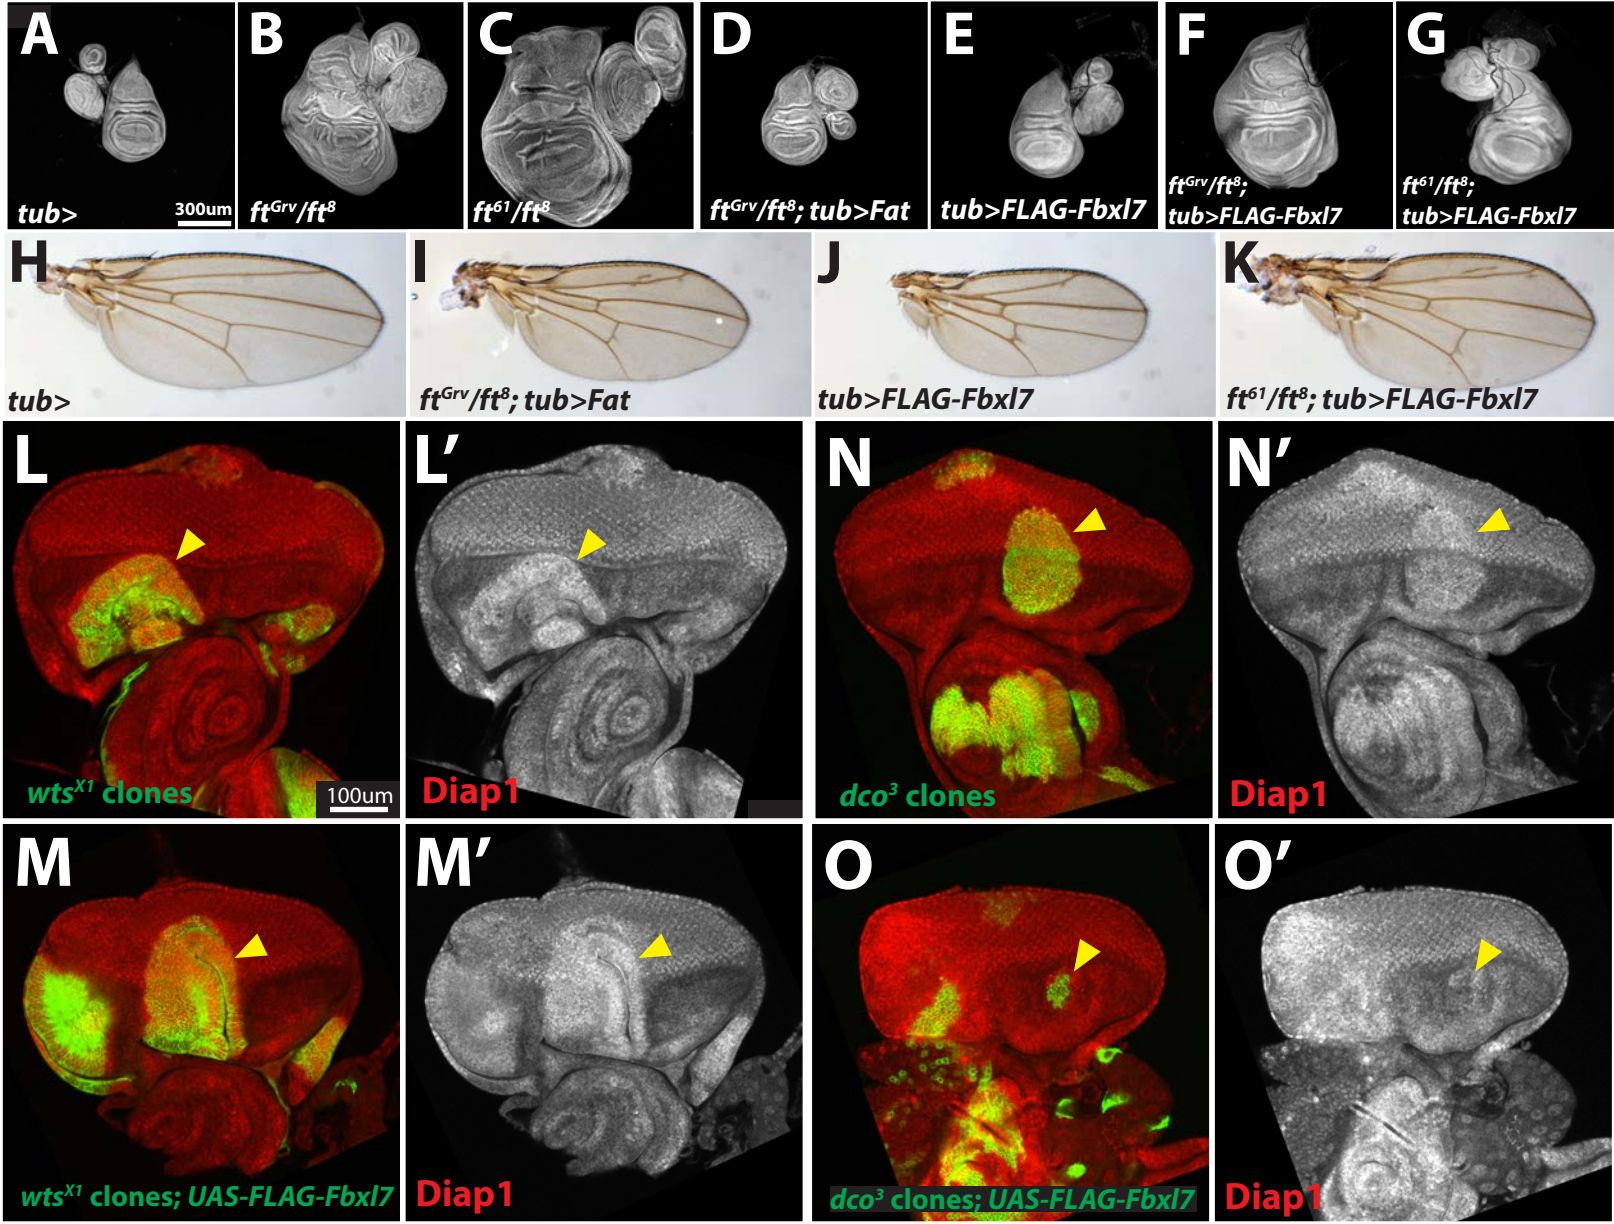

Supplement: supp [file elife-03383-supp-v1.zip]

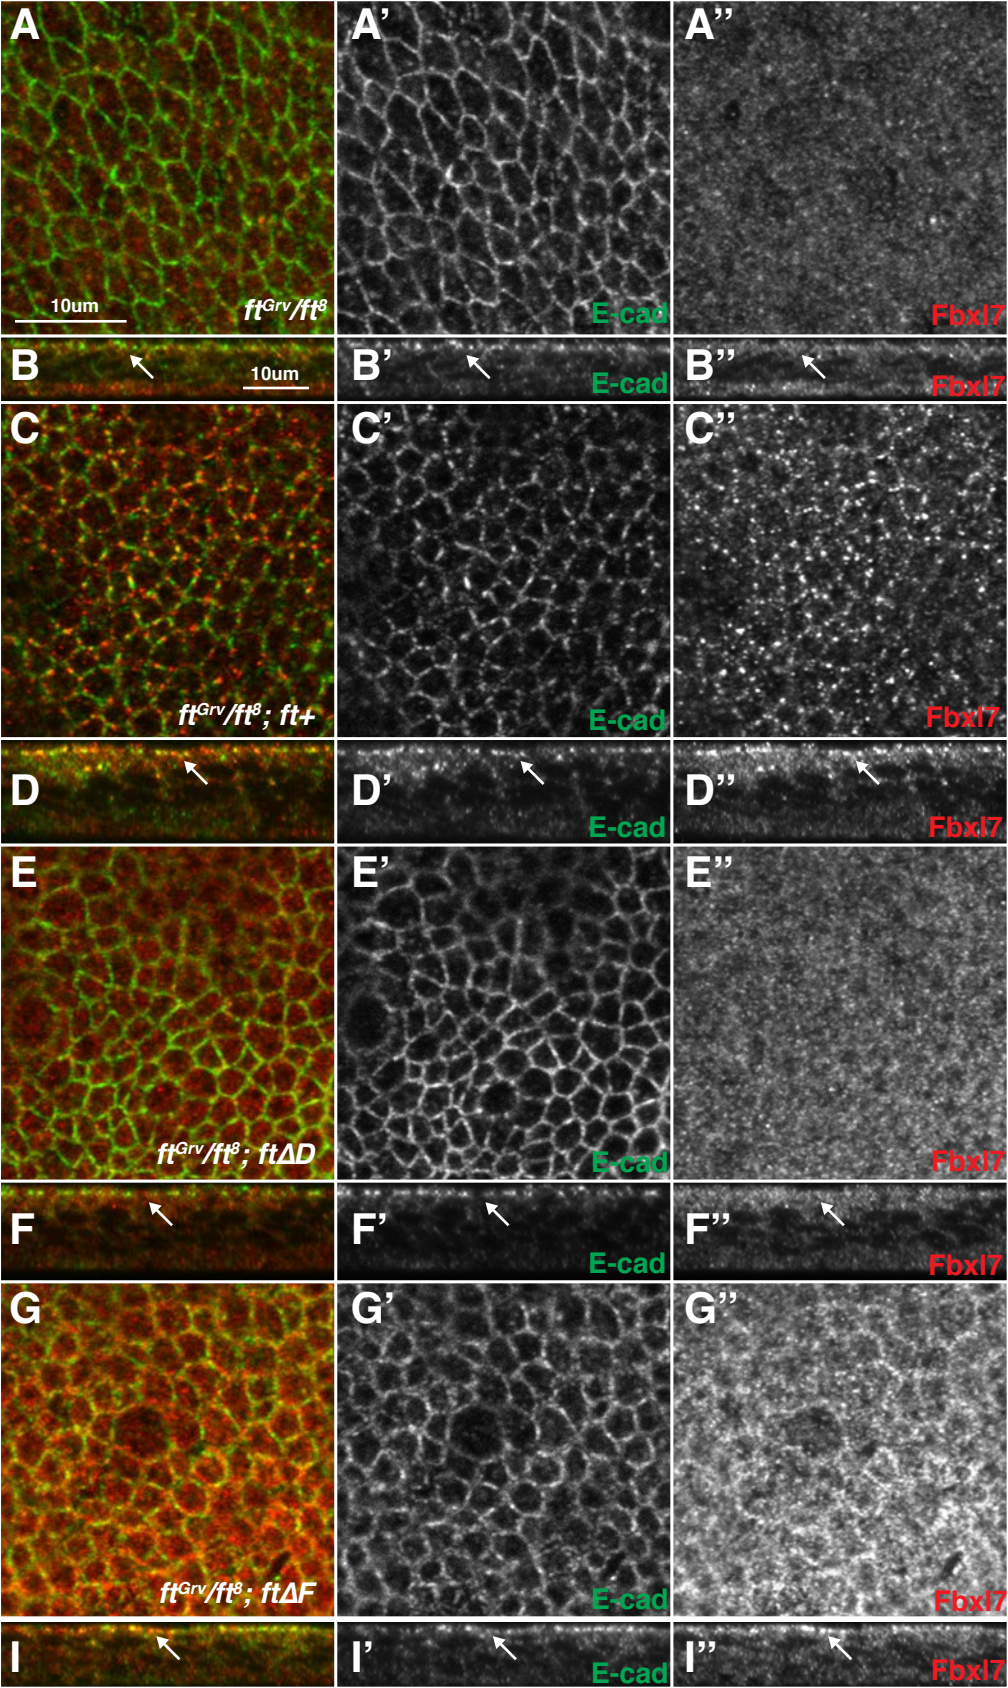

Supplement: supp [file elife-03383-supp-v1.zip]

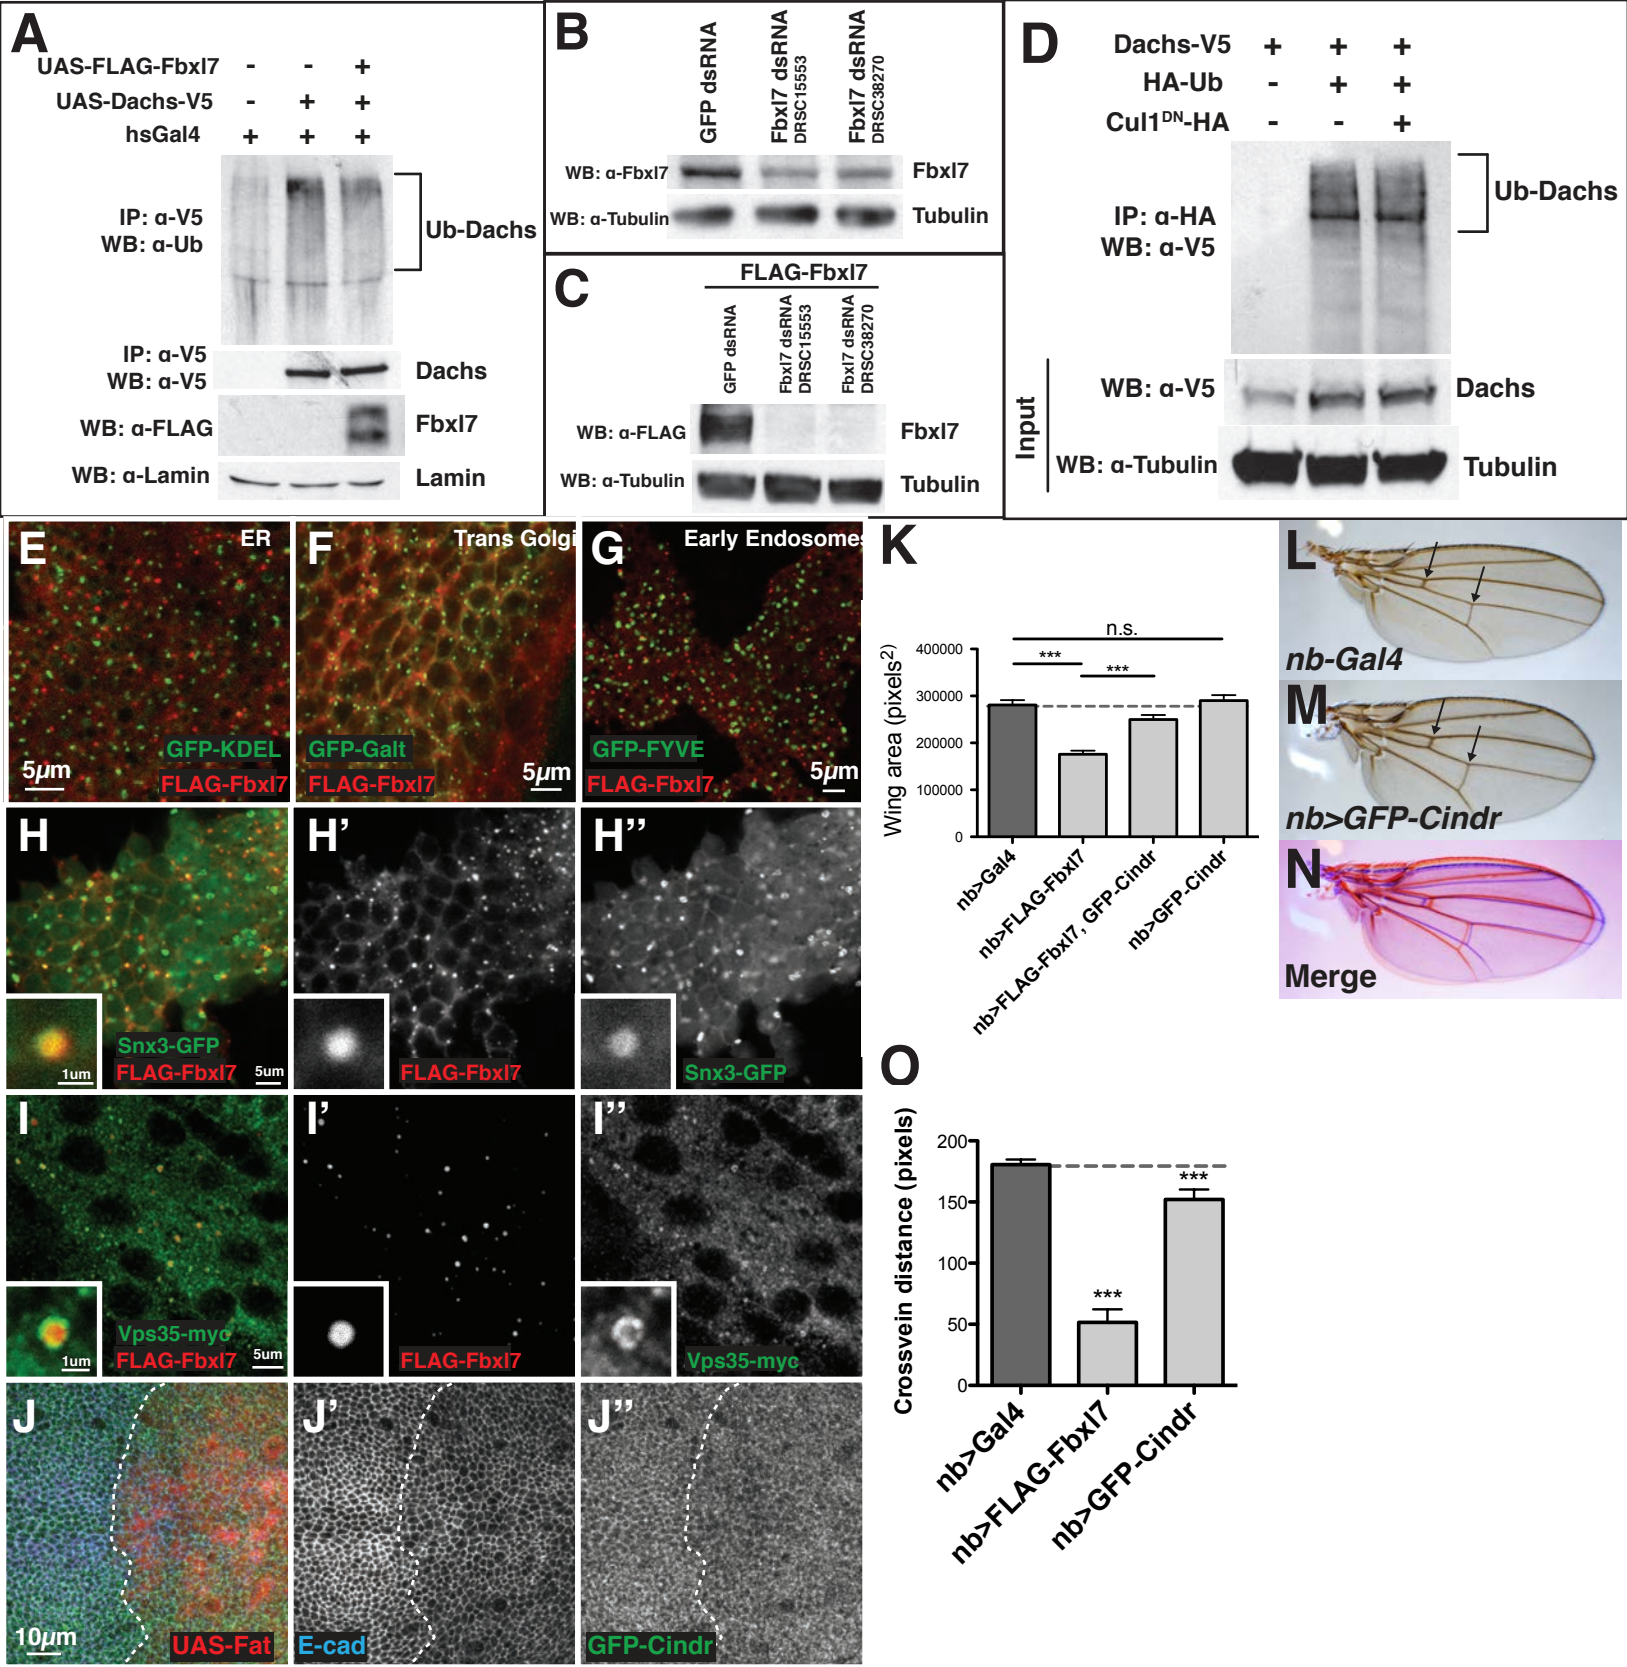

Supplement: supp [file elife-03383-supp-v1.zip]

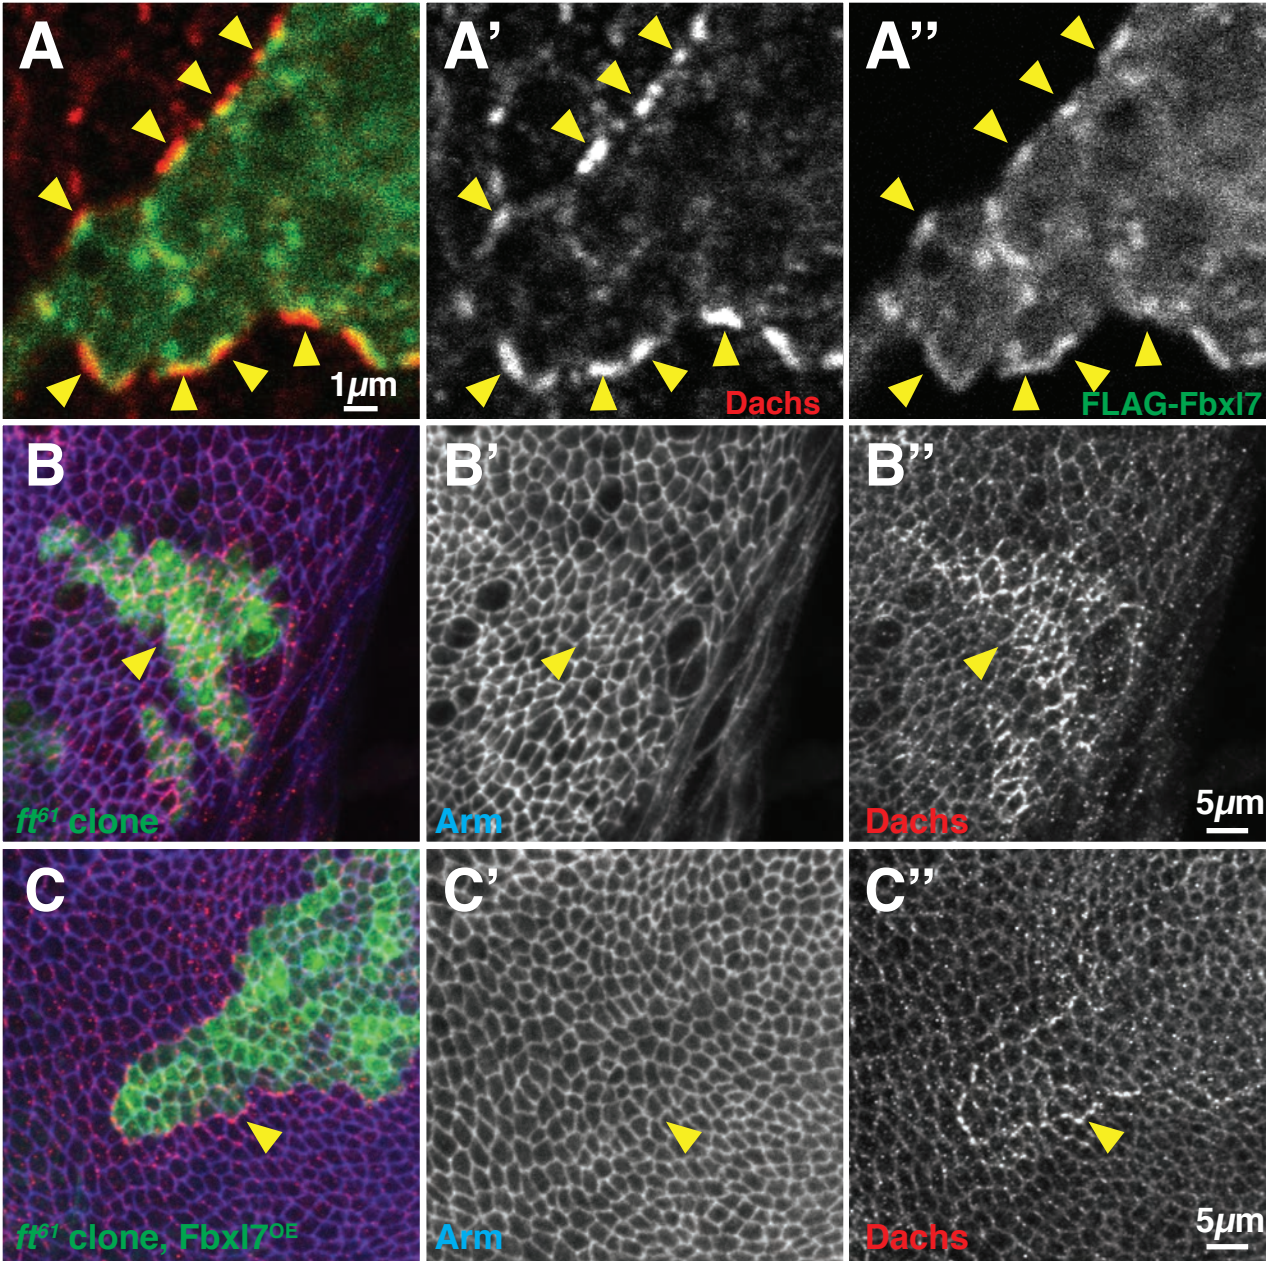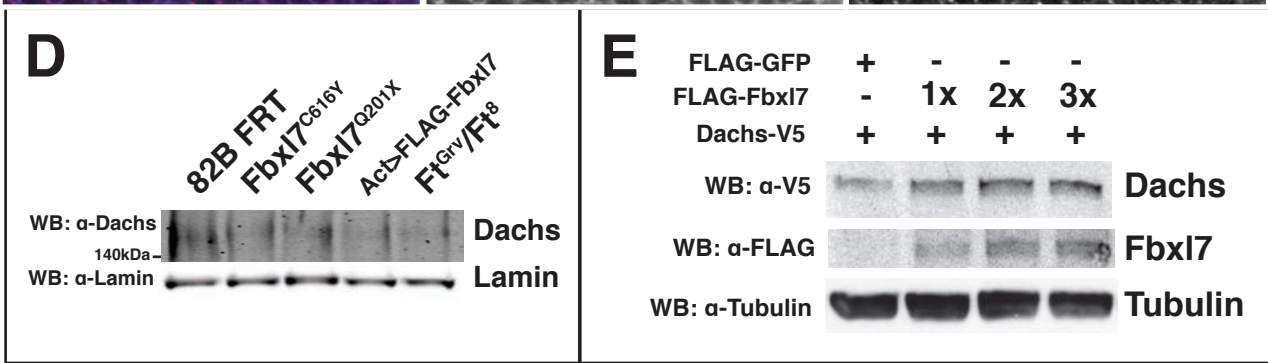

Supplement: supp [file elife-03383-supp-v1.zip]

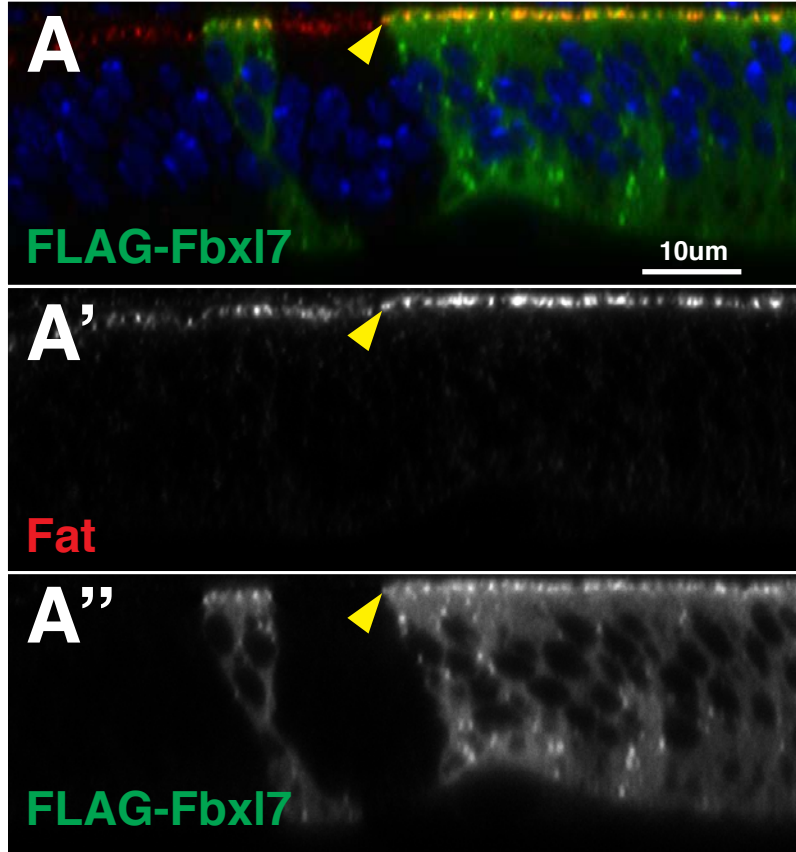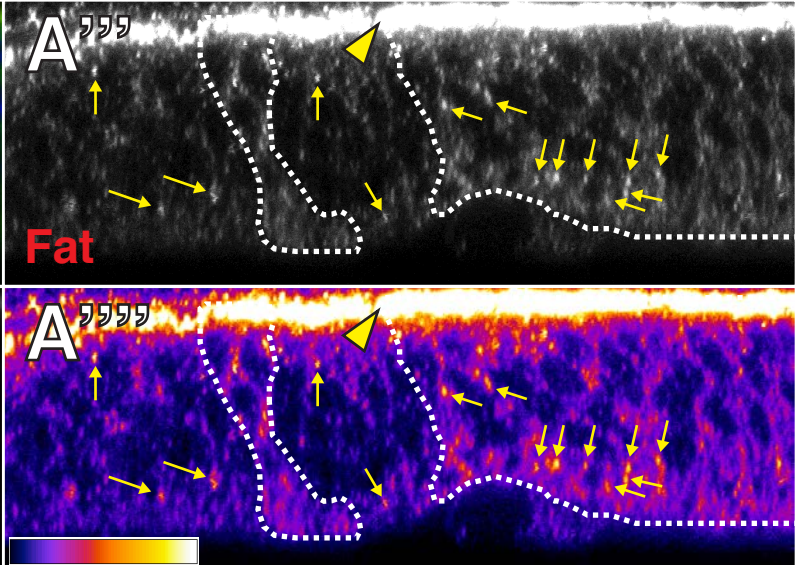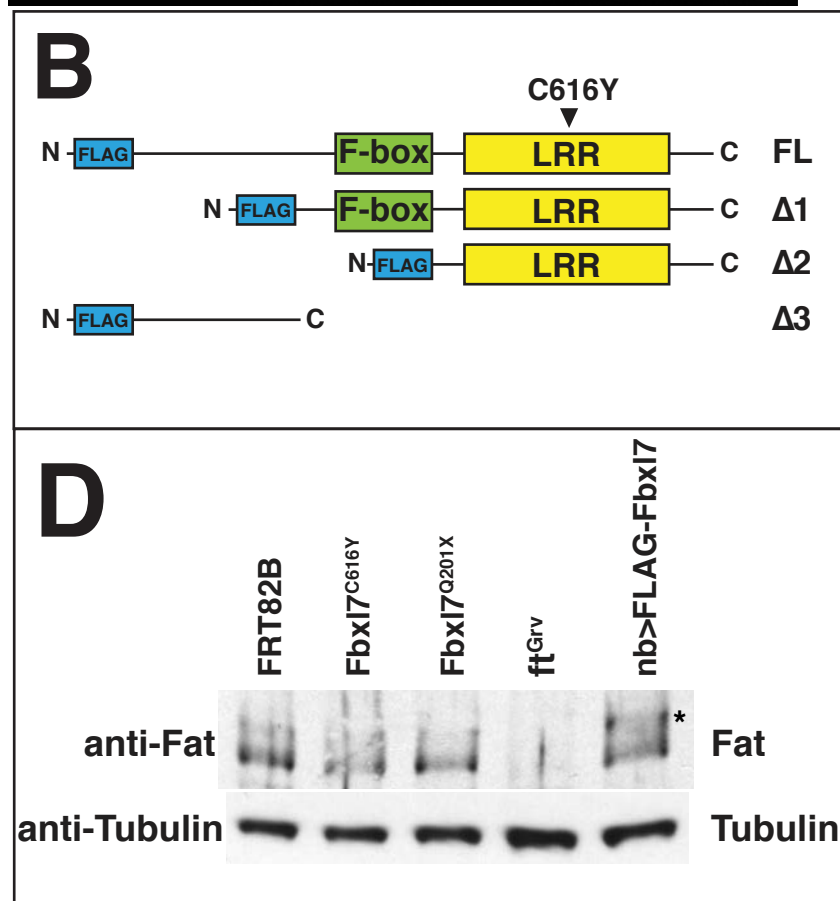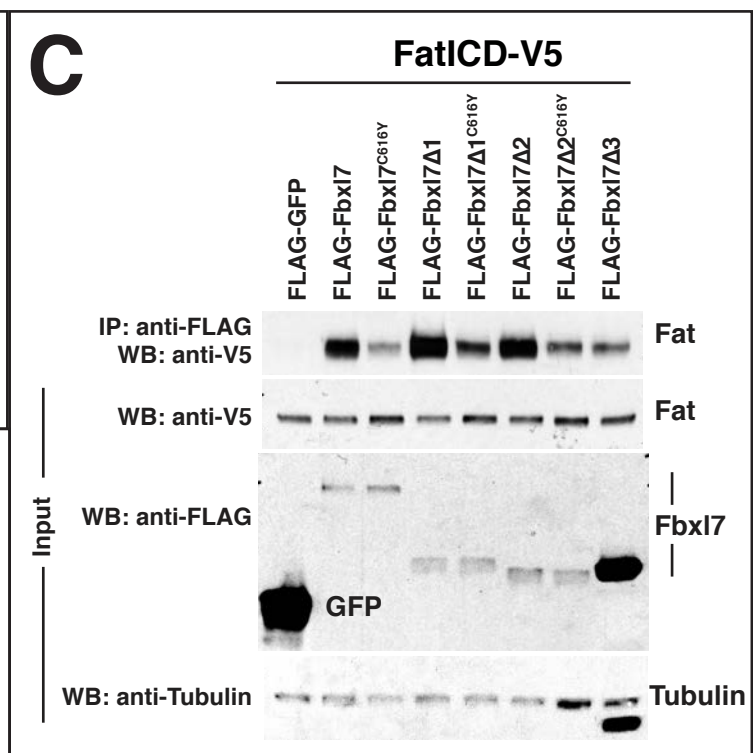

Supplement: supp [file elife-03383-supp-v1.zip]

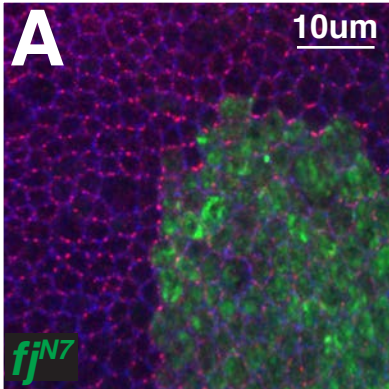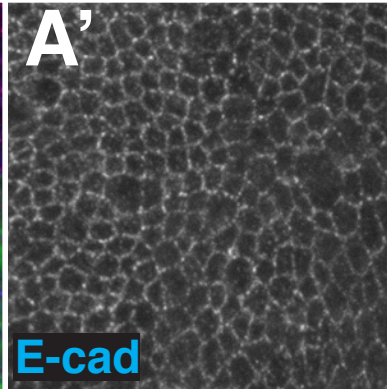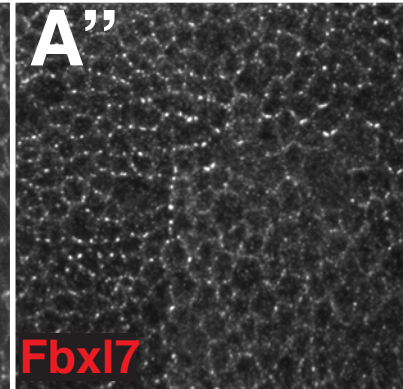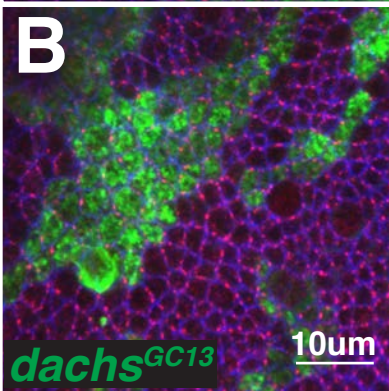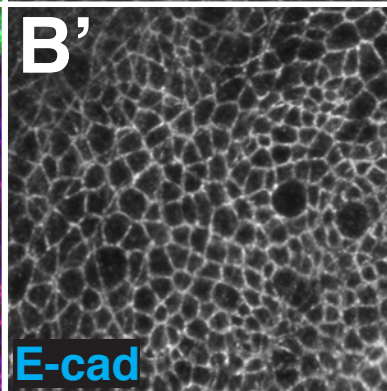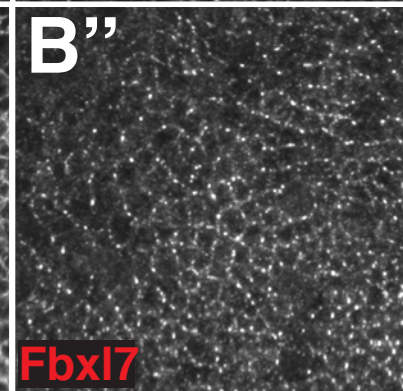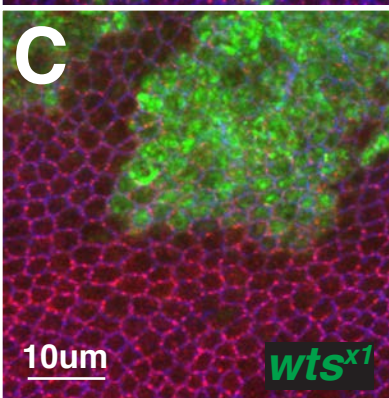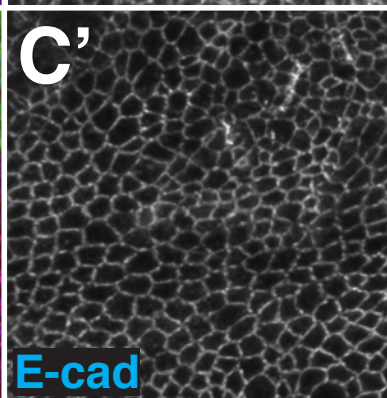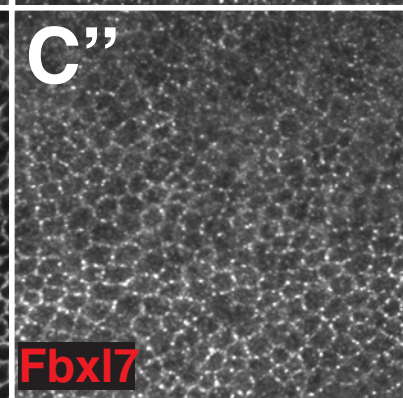

Supplement: supp [file elife-03383-supp-v1.zip]

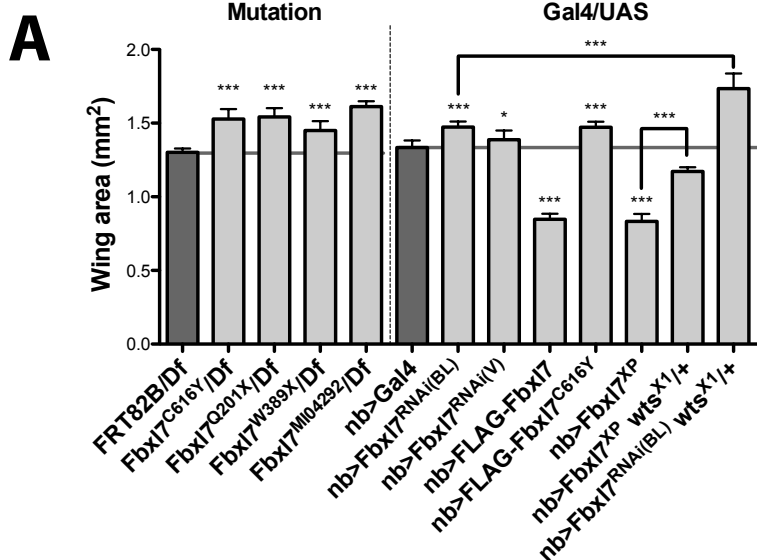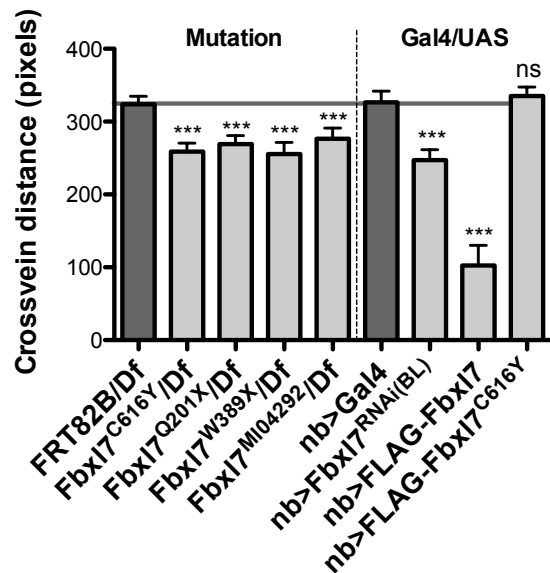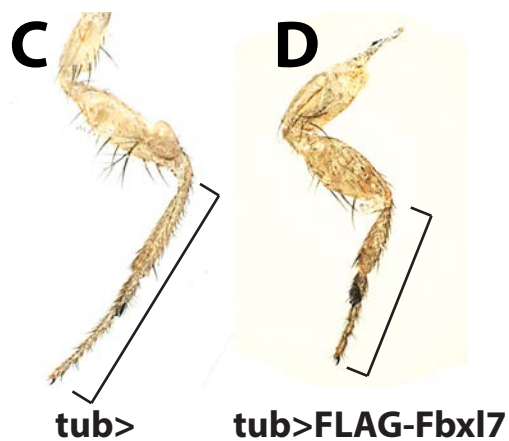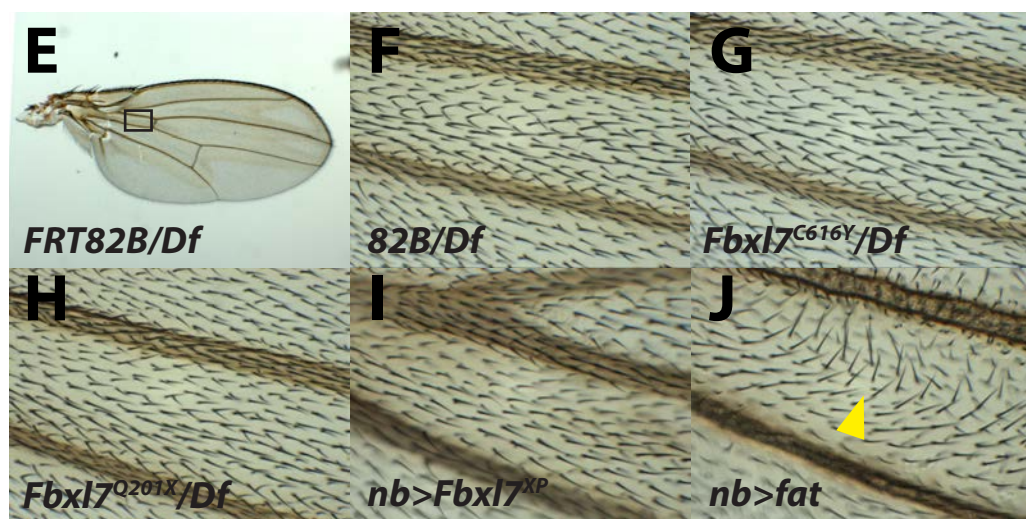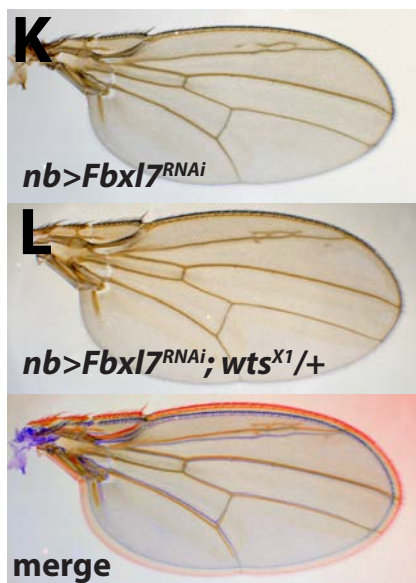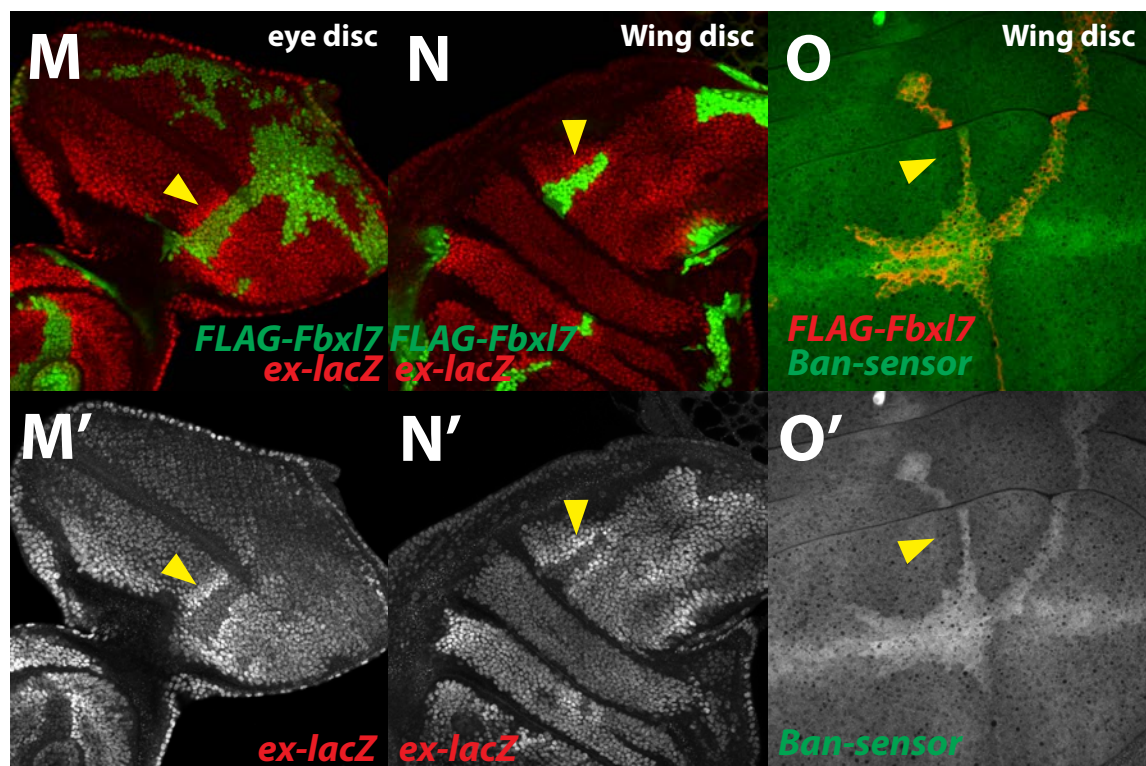

Supplement: supp [file elife-03383-supp-v1.zip]
